# Supplementary material for: Accumulation of inorganic polyphosphate enables stress endurance and catalytic vigour in Pseudomonas putida KT2440
Source: PubMed Central journal article supplement (PMC3673903; doi:10.1186/1475-2859-12-50), 2013-05-20
Supplement: 1475-2859-12-50-S1.pdf [file 1475-2859-12-50-S1.pdf]

## Supplementary Information for Nickel *et al.*

**Table S1.** Oligonucleotides used in this work.

| Oligonucleotide <sup>a</sup>     | Sequence (5'→3')                                                             | Restriction enzyme |
|----------------------------------|------------------------------------------------------------------------------|--------------------|
| $\Delta ppk$ -TS1-F              | CGG <u>AAT TCC</u> AGT CGG GCG TGA AAA TCG ACT TGG                           | <i>EcoRI</i>       |
| $\Delta ppk$ -TS1-R <sup>b</sup> | <b>GTT AAC GAC CGA GAA CAA CCA GAT</b> CTC AGC GTA CGT<br>TGA GGA CCG GGT T  |                    |
| $\Delta ppk$ -TS2-F              | GAT CTG GTT GTT CTC GGT CGT TAA C                                            |                    |
| $\Delta ppk$ -TS2-R              | CGT <u>CTA GAG</u> GAA GCG ATG TCG TCC AGA ACC GGA                           | <i>XbaI</i>        |
| $\Delta ppk$ -TS1-F              | CGG <u>AAT TCC</u> CAG ATT GAT ATC CAT GTA ACC GCG                           | <i>EcoRI</i>       |
| $\Delta ppk$ -TS1-R <sup>b</sup> | <b>CGG CTT CGT CCT CAG CGT ACG TTG</b> ACT CTT CTG GGA<br>GCT CCT GAG CAT CC |                    |
| $\Delta ppk$ -TS2-F              | TCA ACG TAC GCT GAG GAC GAA GCC G                                            |                    |
| $\Delta ppk$ -TS2-R              | CGT <u>CTA GAG</u> CAC GAA ATC GGG CTG GAC ATT GCC                           | <i>XbaI</i>        |
| pSW-F                            | GGA CGC TTC GCT GAA AAC TA                                                   |                    |
| pSW-R                            | AAC GTC GTG ACT GGG AAA AC                                                   |                    |
| P <sub>ppsS</sub> -F             | CCG <u>GGA ATT CGA</u> CAC CCT GTT CTC CAT CG                                | <i>EcoRI</i>       |
| P <sub>ppsS</sub> -R             | CCG <u>CGG ATC CAA</u> GCG CGC AAA ATG CAC TTC                               | <i>BamHI</i>       |
| <i>ppk</i> -F <sup>c</sup>       | CGC GGG <u>AAT TCA</u> Gga aag gaT ATA <b>ATG</b> CTG CAG ACC CC             | <i>EcoRI</i>       |
| <i>ppk</i> -R                    | CGC GGG <u>GAT CCT</u> TAT CAG CGT ACG TTG AGG AC                            | <i>BamHI</i>       |

<sup>a</sup> Recognition sites for the restriction enzymes indicated are underlined in the oligonucleotide sequence.

<sup>b</sup> Complementary sequences added to the oligonucleotides in order to generate DNA fragments for gene deletion by sewing (cross-over) PCR are shown in red.

<sup>c</sup> A Shine-Dalgarno motif (lowercase) was added to the sequence in the forward oligonucleotide used for *ppk* cloning, and the *ppk* start codon is highlighted in boldface.

Figure S1. Phenotypic changes detected by phenotypic microarray assays.

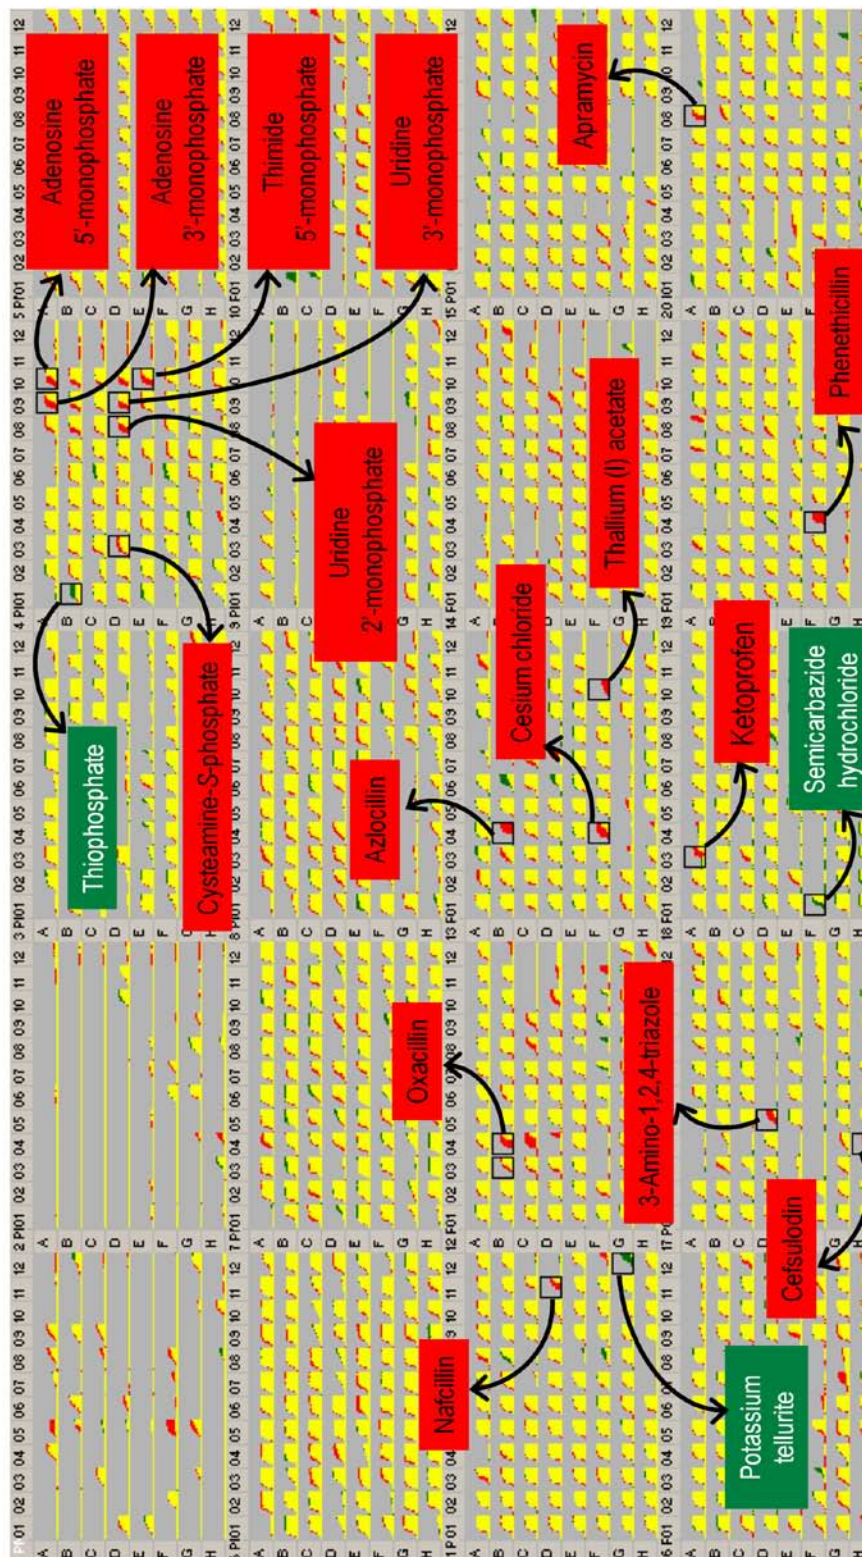

Significant changes (also shown in Table 1 in the main text) are enclosed in boxes and indicated by arrows. Yellow boxes indicate that respiration levels in the wild-type strain and that of the  $\Delta ppk$  mutant was similar for the condition being tested. Red boxes indicate higher respiration rates of the wild-type strain than the mutant strain and, conversely, green boxes indicate higher respiration rates of the mutant strain as compared to the parental strain.
